# Supplementary material
Source: publisher figshare collection journal article supplement (https://tandf.figshare.com/ndownloader/files/1815397)
Supplement: Supplementary file 1 [file 1815397]

**Pilot-scale evaluation of anammox based main-stream nitrogen removal from municipal wastewater**

T. Lottia, [[1]](#footnote-1), R. Kleerebezema, Z. Hub, B. Kartalb, M.K. de Kreukd, *, C. van Erp Taalman Kipd, J. Kruit e, **, T.L.G. Hendrickx e, M.C.M. van Loosdrechta, 2

*a Department of Biotechnology, Delft University of Technology, Delft, The Netherlands*

*b Department of Microbiology, IWWR, Radboud University Nijmegen, Nijmegen, The Netherlands*

*d Waterschap Hollandse Delta, Ridderkerk, The Netherlands*

*e Paques b.v., Balk, The Netherlands*

** Present address: Department of Civil Engineering, Delft University of Technology, Stevinweg 1, Delft 2628 CN, the Netherlands*

*** Present address: Orgaworld b.v., PO Box 5076, Pettelaarpark 100, ‘S-Hertegenbosch 5216 PR, the Netherlands*

**APPENDIX. Additional supporting material**


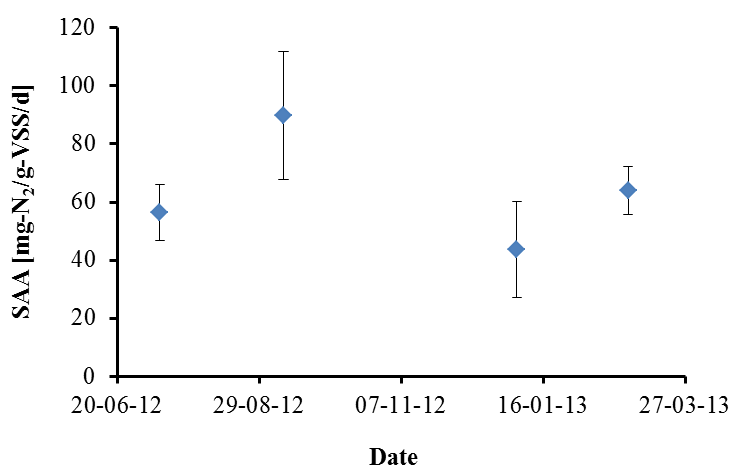


Figure S1. Biomass specific maximum anammox activity (SAA, mg-N2 g-VSS-1 d-1) as measured during anoxic ex-situ manometric batch tests conducted in triplicates.


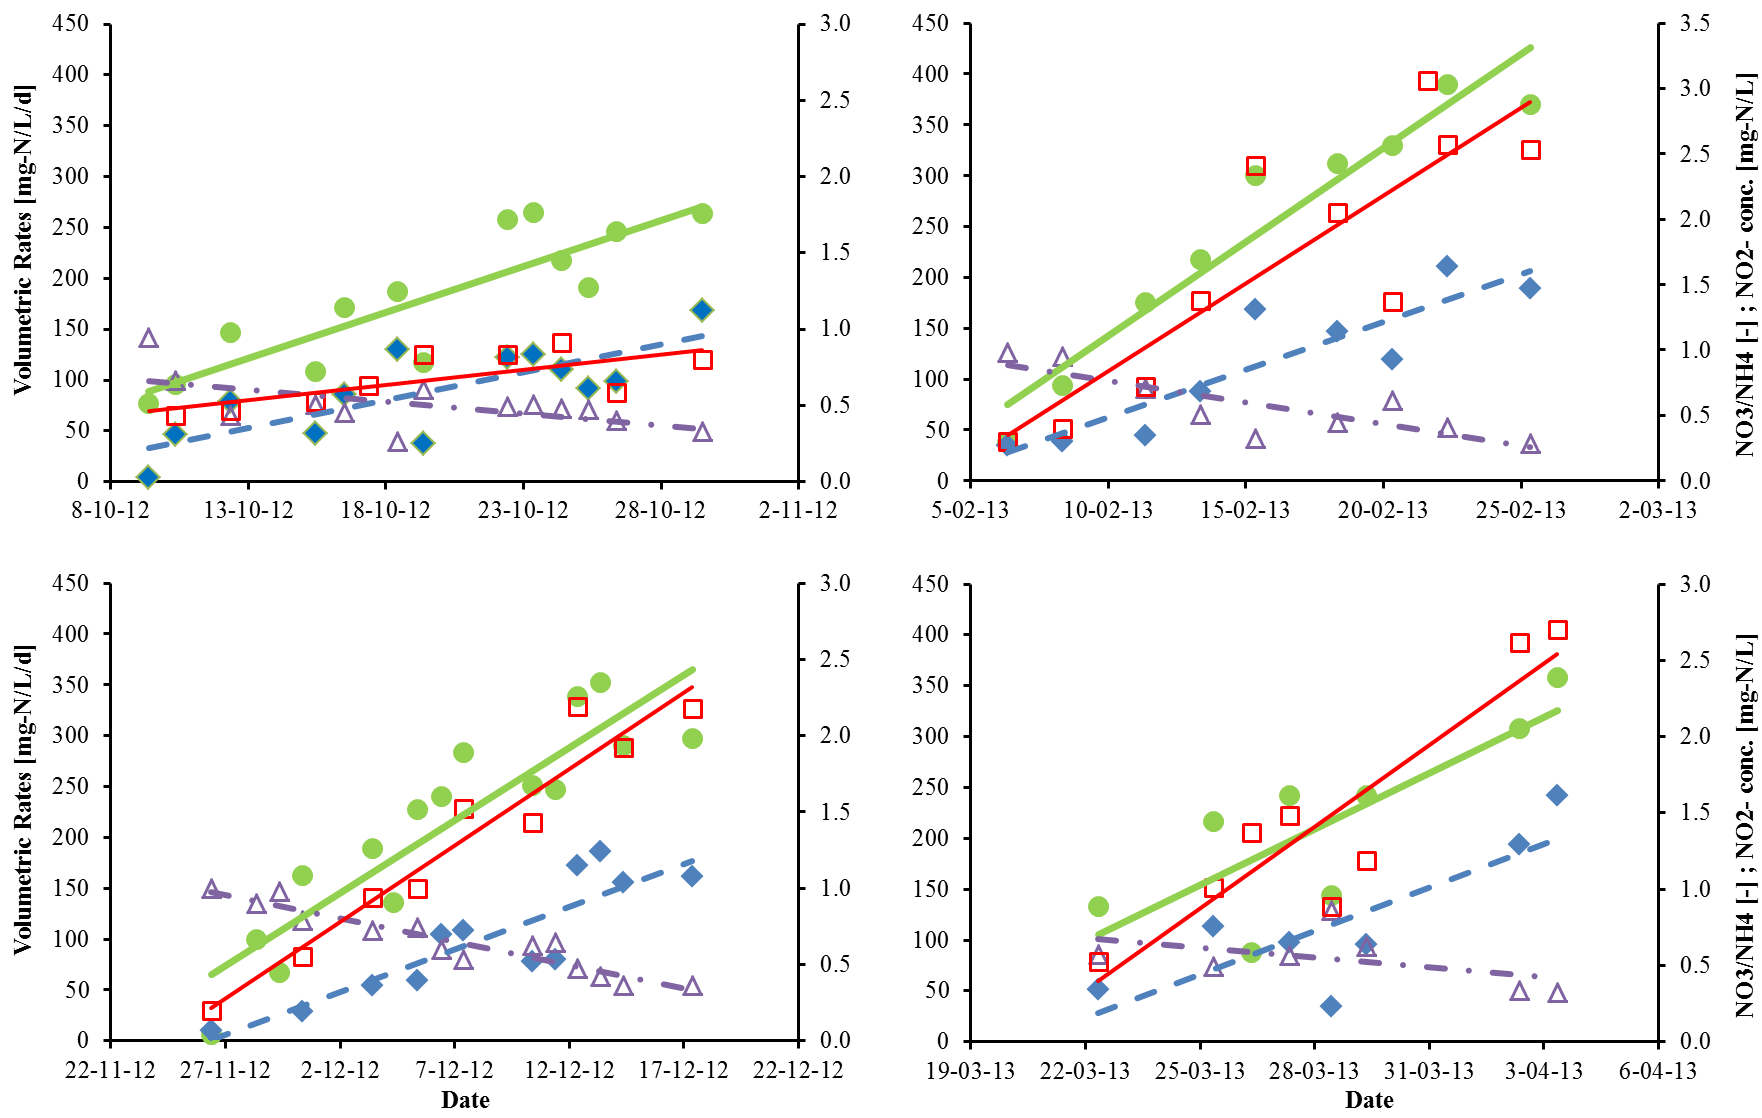


Figure S2. Change in volumetric ammonium conversion rate (green circles) and total nitrogen removal rate (blue diamonds) [*left y-axis*], NO3/NH4-conversion ratio (purple triangles) and nitrite effluent concentration (red squares) [*right y-axis*] during four distinct periods of increasing performances (i.e. positive trend of total nitrogen removal rate). The DO was constant (1.5±0.2 mgO2 L-1) during these four periods.

**
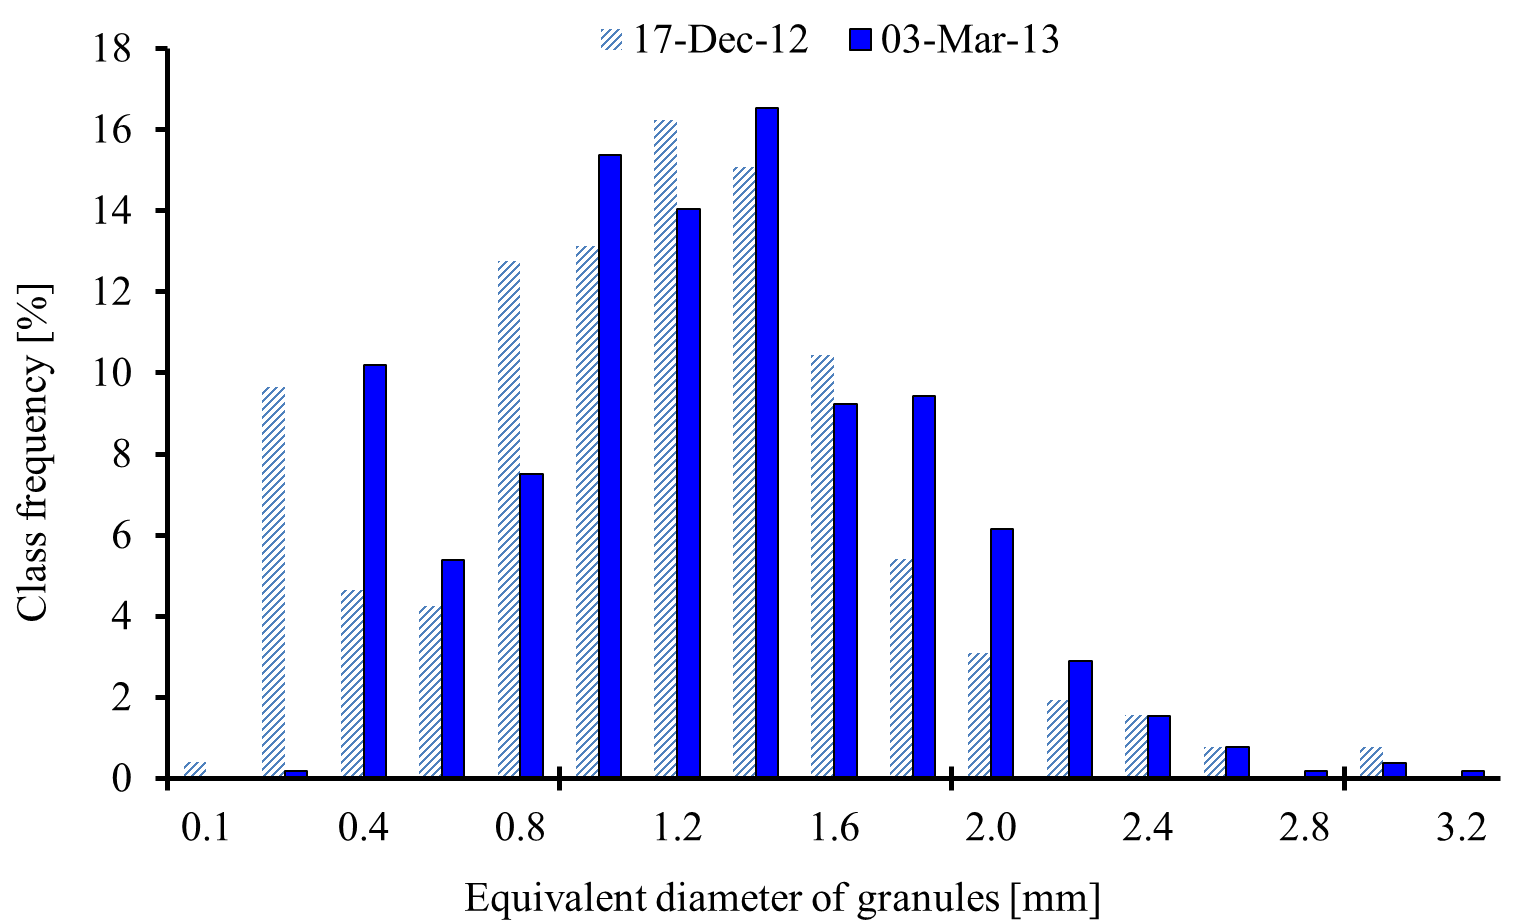
**

Figure S3. Size distribution of granular biomass. More than 1000 particles analyzed. Analysis was conducted on December the 17th 2012 (*light blue bars*) and on March the 13th 2013 (*dark blue bars*).


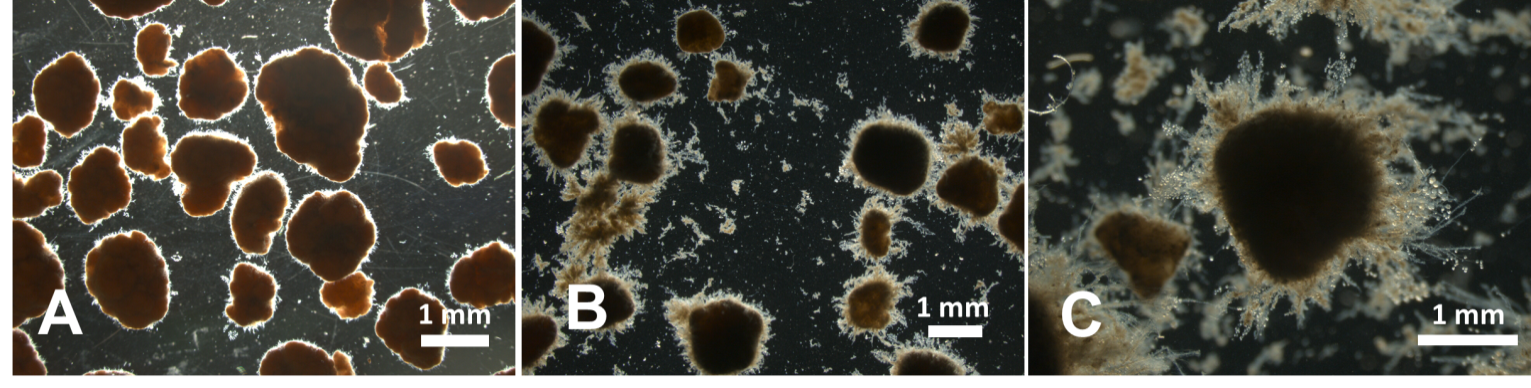


Figure S4. Black background picture of granules during normal operations (A) and during the episode of vorticella-like protozoa blooming (B and C).

1. **1** Corresponding author, Tommaso Lotti, E-mail: [T.Lotti@tudelft.nl](mailto:T.Lotti@tudelft.nl); [Tommaso.Lotti@polimi.it](mailto:Tommaso.Lotti@polimi.it)

   **2** Additional corresponding author, Mark van Loosdrecht, E-mail: [M.C.M.vanLoosdrecht@tudelft.nl](mailto:M.C.M.vanLoosdrecht@tudelft.nl) [↑](#footnote-ref-1)
